# Supplementary material for: Sex-biased expression between guppies varying in the presence of ornamental coloration
Source: PeerJ. 2018 Oct 11;6:e5782. doi: 10.7717/peerj.5782 (PMC6186404; doi:10.7717/peerj.5782)
Supplement: Table S1 — Expression estimates for each sample are given in counts per million mapped reads (CPM). Positive log2 fold-changes indicate higher expression in males, while negative numbers indicated higher expression in females. Linkage groups in guppies largely correspond to chromosomes, with LG12 being the X chromosome. Listed also is the gene function from the reference where the identity of the color gene was described. [file peerj-06-5782-s001.xlsx]

## Sheet: TableS1
Table S1. Color genes annotated in male and female Trinidadian guppies. Expression estimates for each sample are given in counts per million mapped reads (CPM). Positive log2 fold-changes indicate higher expression in males, while negative numbers indicated higher expression in females. Linkage groups in guppies largely correspond to chromosomes, with LG12 being the X chromosome. Listed also is t…
GeneID	Male_GH4_CPM	Male_GH5_CPM	Female_GH4_CPM	Female_GH5_CPM	Log2FC	FDR corrected P-value	Linkage Group	Gene Function	Reference
abhd11	7.48468	9.69386	12.4237	8.33524	-0.150404	N.S.	LG14	uncategorized_function	Braasch et al. 2009
adamts20	93.1646	104.385	207.653	135.792	-0.627021	N.S.	LG6	melanophore_development	Braasch et al. 2009
ap3b1	91.1949	84.5286	98.4214	69.9635	0.0853955	N.S.	LG12	melanosome_construction	Braasch et al. 2009
ap3d1	87.6496	90.6634	85.8363	63.9254	0.247681	N.S.	LG4	melanosome_construction	Braasch et al. 2009
apc	53.9685	90.9443	58.8915	60.7094	0.244597	N.S.	unknown	melanophore_development	Braasch et al. 2009
asip	0.787861	0.234151	0.806733	0.328159	-0.0431657	N.S.	unknown	regulation_of_melanogenesis	Braasch et al. 2009
atox1	56.529	54.5572	50.5015	47.9112	0.169079	N.S.	LG10	systemic_effects	Braasch et al. 2009
atp6ap1	3.54538	6.0411	3.22693	7.15387	-0.0669691	N.S.	LG7	systemic_effects	Braasch et al. 2009
atp6ap2	55.1503	59.0529	46.9518	55.8527	0.137876	N.S.	LG2	systemic_effects	Braasch et al. 2009
atp6v0d1	70.7105	73.6171	60.3436	76.5923	0.0716683	N.S.	LG3	systemic_effects	Braasch et al. 2009
atp6v1e1	20.0905	14.4237	20.007	18.7051	-0.124763	N.S.	LG19	systemic_effects, xanthophore_development	Braasch et al. 2009
atp6v1h	47.8626	45.5658	41.1434	49.1582	0.0495614	N.S.	LG17	systemic_effects, xanthophore_development, iridophore_development	Braasch et al. 2009
atp7a	35.2568	30.4865	35.1735	28.4842	0.0633701	N.S.	LG10	systemic_effects	Braasch et al. 2009
atrn	9.6513	12.972	5.64713	10.9605	0.297027	N.S.	LG22	regulation_of_melanogenesis	Braasch et al. 2009
bcmo1	20.6814	22.9	20.3297	20.8053	0.088365	N.S.	LG20	carotenoid-related	Walsh et al. 2012
bloc1s3	10.4392	7.77382	7.74463	9.58224	0.0419255	N.S.	LG13	melanosome_construction	Braasch et al. 2009
creb1	6.69682	3.74642	5.16309	6.62881	-0.143574	N.S.	LG2	melanophore_development, regulation_of_melanogenesis	Braasch et al. 2009
csf1r	76.0286	108.178	72.6059	43.1201	0.578737	N.S.	LG10	xanthophore_development	Braasch et al. 2009
cxcl12	5.1211	5.71329	10.6489	3.28159	-0.155598	N.S.	LG1	melanin_pattern_formation	Svetic et al. 2007
dct	3.74234	8.5231	2.25885	1.57516	1.02014	N.S.	LG2	components_of_melanosomes	Braasch et al. 2009
drd2	0.787861	0.0936605	1.12943	0.787582	-0.318501	N.S.	LG13	regulation_of_melanogenesis	Braasch et al. 2009
dtnbp1	0.393931	0.655623	1.45212	0.918845	-0.35005	N.S.	LG11	melanosome_construction	Braasch et al. 2009
ebna1bp2	29.7418	51.2791	40.8207	32.6846	0.149307	N.S.	LG4	uncategorized_function	Braasch et al. 2009
ece1	100.846	130.048	94.5491	179.175	-0.184938	N.S.	LG5	melanophore_development	Braasch et al. 2009
eda	22.0601	17.8892	27.1062	24.5463	-0.288015	N.S.	LG10	melanophore_development	Braasch et al. 2009
edn3	17.7269	23.181	17.5868	30.125	-0.161444	N.S.	LG5	melanophore_development, xanthophore_development, iridophore_development	Braasch et al. 2009
egfr	139.058	293.298	141.017	284.776	0.0175331	N.S.	LG17	melanophore_development	Braasch et al. 2009
erbb3	115.816	113.985	101.487	138.417	-0.044958	N.S.	LG5	melanophore_development	Braasch et al. 2009
fgfr2	572.184	300.276	634.253	435.27	-0.207094	N.S.	LG15	melanophore_development	Braasch et al. 2009
fig4	17.136	14.9857	14.5212	13.9796	0.151063	N.S.	LG21	melanosome_construction	Braasch et al. 2009
foxd3	8.07558	10.1622	4.5177	7.35076	0.423861	N.S.	LG4	melanophore_development, xanthophore_development, iridophore_development	Braasch et al. 2009
frem2	0.590896	0.561963	1.29077	1.11574	-0.366579	N.S.	LG14	melanophore_development	Braasch et al. 2009
fzd4	31.9084	17.093	51.3082	29.0749	-0.510058	N.S.	LG13	melanophore_development	Braasch et al. 2009
gch1	55.7412	24.0707	90.5154	47.9112	-0.544653	N.S.	LG3	pteridine_synthesis	Braasch et al. 2009
gchfr	6.89379	4.35521	8.87406	4.79112	-0.165458	N.S.	LG22	pteridine_synthesis	Braasch et al. 2009
gja5	12.0149	19.3877	2.4202	3.08469	1.73604	0.000594887	LG2	uncategorized_function	Braasch et al. 2009
gpc3	1.77269	1.87321	2.58154	1.70643	-0.0870164	N.S.	LG10	melanophore_development	Braasch et al. 2009
gpnmb	9.45434	48.6098	6.61521	5.90686	1.26788	N.S.	LG11	components_of_melanosomes	Braasch et al. 2009
gpr143	98.8766	95.44	58.5688	47.9112	0.770009	N.S.	LG2	melanosome_construction	Braasch et al. 2009
gpr161	27.9691	24.8669	32.592	32.0283	-0.225625	N.S.	LG2	melanophore_development	Braasch et al. 2009
hps1	19.6965	15.9691	13.0691	10.1073	0.514555	N.S.	LG15	melanosome_construction	Braasch et al. 2009
hps3	56.3321	44.3951	42.2728	41.4793	0.235462	N.S.	LG4	melanosome_construction	Braasch et al. 2009
hps4	11.227	16.7652	12.9077	5.84123	0.467917	N.S.	LG9	melanosome_construction	Braasch et al. 2009
hps5	69.9227	66.218	49.2107	57.1653	0.307432	N.S.	LG6	melanosome_construction	Braasch et al. 2009
hps6	7.48468	13.253	12.4237	6.10376	0.17699	N.S.	LG15	melanosome_construction	Braasch et al. 2009
igsf11	7.48468	9.97484	2.4202	1.50953	1.45779	0.0188322	LG13	melanin_pattern_formation	Eom et al. 2012
ikbkg	21.4692	22.057	22.5885	18.4425	0.100289	N.S.	LG7	melanophore_development	Braasch et al. 2009
itgb1	71.4984	86.074	77.9304	86.5027	-0.032471	N.S.	LG20	melanophore_development	Braasch et al. 2009
kit	34.4689	39.8525	16.6187	43.9733	0.185645	N.S.	LG4	melanophore_development	Braasch et al. 2009
kitl	19.3026	31.6104	27.7516	25.9246	-0.0238072	N.S.	LG6	melanophore_development	Braasch et al. 2009
lef1	42.3475	31.1889	62.6024	42.4638	-0.392854	N.S.	LG1	melanophore_development	Braasch et al. 2009
lyst	26.9842	20.9799	22.9112	13.192	0.35641	N.S.	LG15	melanosome_construction	Braasch et al. 2009
mbtps1	69.5288	75.1625	71.7992	67.2726	0.0730866	N.S.	LG6	melanophore_development	Braasch et al. 2009
mc1r	4.92413	8.6636	3.06558	2.23148	0.91256	N.S.	LG3	regulation_of_melanogenesis	Braasch et al. 2009
mcoln3	3.54538	2.62249	4.5177	4.46296	-0.353491	N.S.	LG4	melanophore_development	Braasch et al. 2009
mgrn1	61.2562	53.246	62.6024	63.4003	-0.101737	N.S.	LG8	regulation_of_melanogenesis	Braasch et al. 2009
mitf	19.3026	23.7429	6.77655	6.30065	1.35637	0.00918503	LG7	melanophore_development	Braasch et al. 2009
mlana	73.2711	143.722	17.4254	20.6084	1.88917	2.03776e-05	LG12	melanin_regulation	Sharma et al. 2014
mmp2	1034.66	596.945	1360.15	1039.21	-0.428921	N.S.	LG19	melanosome_transport	Ellis & Crawford 2006
myc	7.68165	13.4403	13.3918	12.9951	-0.193959	N.S.	LG20	melanophore_development	Braasch et al. 2009
mycbp2	167.421	189.101	183.935	136.645	0.165136	N.S.	LG2	pteridine_synthesis	Braasch et al. 2009
myo7a	0	1.0771	1.12943	0.328159	-0.0322219	N.S.	LG13	melanosome_transport	Braasch et al. 2009
oca2	11.0301	45.4722	4.67905	10.4355	1.05206	N.S.	LG4	melanosome_construction	Braasch et al. 2009
pabpc1	1338.77	1609.65	1337.56	1586.39	0.0252644	N.S.	LG16	uncategorized_function	Braasch et al. 2009
paics	70.7105	69.4493	56.1486	68.979	0.144727	N.S.	LG4	pteridine_synthesis	Braasch et al. 2009
pax3	5.51503	11.8012	5.64713	5.64434	0.447711	N.S.	LG13	melanophore_development, xanthophore_development	Braasch et al. 2009
pax7	54.5594	93.2858	16.78	10.9605	1.88702	1.13753e-05	LG5	xanthophore_development	Braasch et al. 2009
pcbd1	30.5296	22.7595	40.0139	40.4292	-0.479387	N.S.	LG15	pteridine_synthesis	Braasch et al. 2009
pcbd2	7.09075	4.72985	5.96982	5.05365	0.071163	N.S.	unknown	pteridine_synthesis	Braasch et al. 2009
pmel	84.6951	262.858	37.9164	85.3213	0.924132	N.S.	LG5	components_of_melanosomes	Braasch et al. 2009
pts	17.136	20.9799	8.71271	6.95697	1.03068	N.S.	LG19	pteridine_synthesis	Braasch et al. 2009
qdpr	207.011	201.979	239.761	211.531	-0.0978765	N.S.	LG10	pteridine_synthesis	Braasch et al. 2009
rab27a	88.8314	89.1648	83.4161	55.5245	0.337319	N.S.	LG3	melanosome_transport	Braasch et al. 2009
rab32	34.6659	46.8771	33.3987	45.3516	0.0513184	N.S.	LG21	components_of_melanosomes	Braasch et al. 2009
rab38	22.0601	26.0844	4.67905	3.74101	1.9644	2.42273e-06	LG13	components_of_melanosomes	Braasch et al. 2009
rabggta	12.8027	21.3078	11.4556	17.4581	0.182626	N.S.	LG4	melanosome_construction	Braasch et al. 2009
rpl24	599.562	599.474	545.351	693.663	-0.0297289	N.S.	LG11	systemic_effects	Braasch et al. 2009
rps20	1246.4	891.976	1110.39	1623.4	-0.283058	N.S.	LG20	systemic_effects	Braasch et al. 2009
scarb1	119.164	152.62	77.285	46.0079	0.967221	N.S.	LG12	carotenoid-related	Walsh et al. 2012
scarb2	168.799	217.433	163.928	152.003	0.271125	N.S.	LG9	melanophore_development	Braasch et al. 2009
skiv2l2	41.9536	63.2677	48.7266	44.9578	0.166504	N.S.	LG12	uncategorized_function	Braasch et al. 2009
slc24a4	26.7873	57.367	18.5548	12.6669	1.07877	N.S.	LG21	components_of_melanosomes	Braasch et al. 2009
slc24a5	4.13627	12.7847	3.54962	3.21596	0.816951	N.S.	LG3	components_of_melanosomes	Braasch et al. 2009
slc45a2	5.71199	12.5037	0.968079	2.16585	1.40451	0.0481023	LG12	components_of_melanosomes	Braasch et al. 2009
snai2	53.9685	36.9491	65.668	66.6163	-0.436133	N.S.	LG17	melanophore_development	Braasch et al. 2009
sox10	202.283	280.232	58.4074	42.1356	1.89561	3.6085e-07	LG8	melanophore_development, xanthophore_development, iridophore_development	Braasch et al. 2009
spr	126.846	142.551	55.6645	63.0722	1.00432	N.S.	LG12	pteridine_synthesis	Braasch et al. 2009
star	0.590896	1.03027	1.29077	1.37827	-0.247693	N.S.	LG9	carotenoid-related	Walsh et al. 2012
stard3	36.8325	29.6435	32.592	30.5844	0.0753893	N.S.	LG17	carotenoid-related	Walsh et al. 2012
stard5	2.36358	3.23129	1.93616	2.82217	0.137981	N.S.	LG3	carotenoid-related	Walsh et al. 2012
tfap2a	119.164	88.9306	90.6767	56.1152	0.445473	N.S.	LG20	melanophore_development	Braasch et al. 2009
tpcn2	44.9081	74.8816	58.0847	51.6522	0.133816	N.S.	LG3	uncategorized_function	Braasch et al. 2009
trim33	43.3324	46.7366	56.1486	39.8385	-0.0387963	N.S.	LG7	iridophore_development	Braasch et al. 2009
txndc5	104.983	71.7439	110.361	90.2437	-0.132094	N.S.	LG20	melanosome_construction	Braasch et al. 2009
tyr	76.0286	89.5863	11.1329	11.4199	2.38204	6.90614e-12	LG13	components_of_melanosomes	Braasch et al. 2009
vps11	85.8769	122.648	105.843	115.709	-0.0494147	N.S.	unknown	melanosome_construction	Braasch et al. 2009
vps18	29.5448	25.2415	21.4591	19.427	0.364705	N.S.	LG21	melanosome_construction, iridophore_development	Braasch et al. 2009
vps33a	31.7114	21.3546	22.7499	24.2838	0.139997	N.S.	LG9	melanosome_construction	Braasch et al. 2009
vps39	25.4085	27.9577	24.3633	18.6394	0.290763	N.S.	LG22	melanosome_construction, iridophore_development	Braasch et al. 2009
wnt3a	14.7724	11.9417	21.6204	10.2386	-0.143308	N.S.	LG17	melanophore_development	Braasch et al. 2009
xdh	38.2113	64.7194	3.38828	2.95343	2.98793	1.38948e-14	LG2	pteridine_synthesis	Braasch et al. 2009
zic2	3.93931	4.96401	3.71097	6.69444	-0.14422	N.S.	LG2	melanophore_development	Braasch et al. 2009
