# Supplementary material for: Sex-biased expression between guppies varying in the presence of ornamental coloration
Source: PeerJ. 2018 Oct 11;6:e5782. doi: 10.7717/peerj.5782 (PMC6186404; doi:10.7717/peerj.5782)
Supplement: Table S2 — Positive log2FC indicates higher expression in males and negative values indicate higher expression in females. Genes known to be involved in coloration are shown in red. LOC genes have unknown annotations. Linkage groups in guppies largely correspond to chromosomes, with LG12 being the X chromosome. [file peerj-06-5782-s002.xlsx]

## Sheet: TableS2
Table S2. Genes found to be significantly differentially expressed (DE) between male and female Trinidadian guppies. Positive log2FC indicates higher expression in males and negative values indicate higher expression in females. Genes known to be involved in coloration are shown in red. LOC genes have unknown annotations. Linkage groups in guppies largely correspond to chromosomes, with LG12 bein…
GeneID	Male_GH4_CPM	Male_GH5_CPM	Female_GH4_CPM	Female_GH5_CPM	Log2FC	FDR corrected P-value	Linkage Group
gja5	12.0149	19.3877	2.4202	3.08469	1.73604	0.000594887	LG2
igsf11	7.48468	9.97484	2.4202	1.50953	1.458	0.0188322	LG13
mitf	19.3026	23.7429	6.77655	6.30065	1.35637	0.00918503	LG7
mlana	73.2711	143.722	17.4254	20.6084	1.889	2.03776e-05	LG12
pax7	54.5594	93.2858	16.78	10.9605	1.88702	1.13753e-05	LG5
rab38	22.0601	26.0844	4.67905	3.74101	1.9644	2.42273e-06	LG13
slc45a2	5.71199	12.5037	0.968079	2.16585	1.40451	0.0481023	LG12
sox10	202.283	280.232	58.4074	42.1356	1.89561	3.6085e-07	LG8
tyr	76.0286	89.5863	11.1329	11.4199	2.38204	6.90614e-12	LG13
xdh	38.2113	64.7194	3.38828	2.95343	2.98793	1.38948e-14	LG2
adssl1	4.33324	16.3438	2.25885	0.984477	1.42463	0.0461975	LG22
agmo	22.0601	29.5031	7.90598	6.76008	1.44493	0.00270326	LG16
agtrap	16.1512	20.0902	5.64713	3.41285	1.53468	0.0023589	LG5
alk	3.15145	9.27239	0.968079	0.853213	1.4261	0.0461975	LG5
arhgef33	30.3327	52.6372	12.7464	9.97603	1.45856	0.003848	LG15
bai3	4.33324	9.50654	1.61347	0.656318	1.46104	0.0334783	LG15
bhlhe41	8.66647	13.7213	3.06558	2.55964	1.40107	0.0238652	LG6
bscl2	133.149	183.294	27.4289	13.5858	2.32119	3.21102e-09	LG10
cacng1	5.51503	20.8863	2.4202	1.18137	1.57672	0.0129711	LG1
clg19h10orf90	27.9691	46.5961	6.29251	5.18491	2.06134	1.10555e-06	LG19
crabp1	25.4085	25.663	3.38828	1.50953	2.49989	1.65256e-09	LG6
cystm1	7.87861	5.80695	1.12943	0.393791	1.79943	0.00116857	unknown
desi1	60.6653	94.3629	22.1045	20.2146	1.52074	0.000581088	LG8
dgat2	19.8935	21.4014	0.806733	1.247	2.93049	9.1898e-13	LG14
fam213a	52.5897	58.9593	15.0052	7.35076	1.8426	1.47005e-05	LG15
folh1b	52.7867	66.3116	10.0035	9.25408	2.15821	3.21102e-09	LG13
frem3	3.74234	13.253	0.968079	1.11574	1.54697	0.0172904	LG1
gabrb1	7.48468	6.79039	0.806733	0.656318	1.94735	0.000169812	LG22
gng4	33.878	45.519	6.45386	5.18491	2.20422	1.19085e-08	LG15
jph1	4.33324	8.42944	0.968079	0.72195	1.60524	0.00979614	LG20
kiaa1045	10.4392	11.6139	2.0975	1.247	1.88341	0.000126761	LG12
kif5b	23.4389	46.8302	12.585	8.53213	1.30433	0.0353683	LG20
kirrel2	55.9381	65.2814	22.1045	12.1419	1.49223	0.000999939	LG16
litaf	5.1211	11.4266	1.29077	0.590686	1.76121	0.00186076	LG1
LOC103456531	108.922	125.411	32.2693	25.3995	1.7355	1.36106e-06	LG20
LOC103456862	4.13627	8.85092	0.968079	0.787582	1.58853	0.0113252	LG20
LOC103457105	65.3925	107.756	20.3297	17.3924	1.76112	2.66176e-05	LG2
LOC103457118	8.27254	41.8194	2.25885	4.79112	1.44644	0.0390249	LG21
LOC103457563	2.95448	9.17873	0.322693	0.393791	1.74259	0.00270326	LG21
LOC103458081	2.95448	2.80981	0	0	1.67942	0.00367871	LG22
LOC103458152	1.57572	16.0159	0.48404	0.262527	1.54055	0.0147967	LG22
LOC103458370	7.48468	25.8503	2.4202	3.74101	1.40219	0.0479444	LG22
LOC103458922	33.878	69.1214	15.9733	16.5392	1.25334	0.0463596	LG22
LOC103460273	3.93931	6.18159	0.322693	0	1.94076	0.000337618	unknown
LOC103460276	3.93931	7.86748	0.48404	0.0656318	1.91253	0.000459352	unknown
LOC103460286	20.8783	30.3928	0.161347	2.55964	2.04262	0.000100852	unknown
LOC103460319	29.1509	50.6703	14.1985	7.41639	1.42619	0.0110433	LG2
LOC103461921	21.4692	23.462	4.03366	1.11574	2.09011	1.44636e-05	LG2
LOC103462168	47.2717	65.4219	21.4591	22.3148	1.12231	0.0481023	LG3
LOC103462423	7.28772	7.39918	1.29077	0.72195	1.78689	0.000899175	LG3
LOC103462566	17.7269	26.4591	2.0975	0.918845	2.65481	7.12085e-10	LG3
LOC103462567	24.2267	65.9838	10.3262	4.1348	1.71155	0.00186076	LG3
LOC103463986	119.558	154.821	25.0087	18.6394	2.22372	2.6632e-10	LG4
LOC103464161	24.8176	41.6321	6.77655	4.3317	1.94911	1.16506e-05	LG1
LOC103464422	8.66647	16.0628	3.06558	1.57516	1.60843	0.00486521	LG5
LOC103464713	9.25737	53.8548	5.96982	3.54412	1.47889	0.0295312	LG5
LOC103464790	1.96965	30.627	0.322693	0.459423	1.65905	0.0046618	LG5
LOC103464932	30.5296	45.4722	9.19675	9.9104	1.56266	0.000674063	LG5
LOC103465114	9.25737	12.2695	1.45212	1.31264	1.9664	5.66385e-05	LG5
LOC103465135	36.4386	81.9529	3.38828	4.1348	2.73308	1.08949e-10	LG1
LOC103465146	11.227	11.0051	3.71097	2.16585	1.39905	0.0189171	LG5
LOC103465589	3.74234	11.6139	1.29077	0.525054	1.56873	0.0144949	LG5
LOC103465623	4.13627	16.3438	1.77481	0.590686	1.54335	0.0182775	LG6
LOC103465645	29.7418	166.482	22.5885	11.0918	1.44057	0.0386236	LG6
LOC103466197	19.8935	45.3317	3.87232	2.75654	2.26515	5.83745e-07	LG6
LOC103466585	34.4689	44.5356	17.4254	13.192	1.14117	0.0408941	LG6
LOC103466900	35.8477	187.555	27.2676	9.45098	1.4438	0.0386236	LG7
LOC103467111	10.0452	9.88118	3.06558	1.247	1.49644	0.0139829	LG7
LOC103467181	19.4996	20.0902	5.96982	6.82571	1.26527	0.0238652	LG7
LOC103467585	4.92413	5.47914	0.161347	0.656318	1.68833	0.0046618	LG7
LOC103468136	33.4841	129.486	19.6843	6.69444	1.55209	0.0140597	LG8
LOC103468165	43.7263	56.1963	16.296	8.79466	1.59682	0.000459352	LG8
LOC103468439	10.6361	19.4346	4.19501	1.96895	1.56081	0.00722519	LG8
LOC103468563	2.56055	3.93374	0	0.262527	1.48907	0.0245527	LG8
LOC103468880	157.178	1023.52	124.237	46.4017	1.48961	0.0276756	LG8
LOC103469025	28.56	32.2192	9.0354	6.23502	1.62055	0.000173742	LG8
LOC103469428	55.1503	111.971	17.4254	18.7051	1.66333	0.000475646	LG8
LOC103469929	90.0131	88.5092	34.5282	25.7277	1.35603	0.000687609	LG9
LOC103470062	36.4386	56.7583	9.0354	5.90686	2.0593	6.77264e-07	LG9
LOC103470227	163.284	236.914	36.787	31.372	2.11975	4.11186e-09	LG9
LOC103470355	60.8623	81.7656	9.68079	6.62881	2.52997	4.94996e-12	LG9
LOC103470356	13.7876	20.0902	1.93616	2.49401	2.04037	1.0136e-05	LG9
LOC103471520	32.8932	53.1992	15.9733	10.8292	1.33729	0.0129862	LG1
LOC103471964	10.8331	13.2998	2.74289	1.83769	1.7138	0.000673982	LG11
LOC103472854	104.589	143.113	6.77655	8.20398	3.2077	8.05519e-20	LG11
LOC103472908	1.37876	8.89775	0.161347	0.0656318	1.49007	0.019004	LG11
LOC103472959	7.87861	10.2558	1.29077	0.787582	1.98368	7.99524e-05	LG11
LOC103473069	20.2874	22.7595	54.6965	58.8061	-1.13287	0.0276756	LG11
LOC103474141	74.059	74.3196	18.2322	14.5046	1.85907	1.5504e-07	LG13
LOC103474447	52.5897	41.0701	21.6204	12.9951	1.18449	0.0309194	LG13
LOC103475390	4.72717	10.2558	1.45212	0.131264	1.43225	0.0425937	LG14
LOC103475607	25.4085	33.2026	8.22867	5.38181	1.67365	0.000173742	LG14
LOC103475764	9.84827	13.6744	1.93616	1.70643	1.84272	0.000206606	LG14
LOC103476520	18.5147	35.4037	3.22693	3.93791	2.03881	1.04303e-05	LG15
LOC103476978	15.3633	36.6681	7.42194	4.92239	1.45174	0.0163866	LG15
LOC103477331	56.726	171.773	18.3935	14.7015	1.90335	0.000115696	LG2
LOC103478352	4.33324	11.4266	1.12943	0.984477	1.602	0.00995327	LG16
LOC103478552	22.848	44.5824	10.0035	8.53213	1.40225	0.012666	LG16
LOC103478871	5.51503	47.5795	4.03366	1.77206	1.47641	0.0310368	LG17
LOC103478941	31.7114	79.0963	8.22867	5.84123	2.08293	7.68722e-06	LG17
LOC103479802	5.31806	55.6343	0.48404	0.393791	2.13863	2.8972e-05	LG17
LOC103480175	378.961	581.772	41.1434	22.3148	3.07772	5.83001e-17	LG18
LOC103481172	50.2262	65.9838	21.2977	12.2075	1.45928	0.00186076	LG2
LOC103481546	100.255	245.109	17.5868	13.1264	2.51129	2.65007e-09	LG19
LOC103482169	136.891	488.908	96.0012	39.9698	1.40403	0.0392839	LG19
mmel1	8.86344	26.2249	0.322693	0.590686	2.628	1.95117e-08	LG5
mospd2	41.5597	61.3476	14.8439	14.7015	1.45246	0.00161089	LG2
mylpf	97.6948	572.219	70.8311	40.4948	1.48356	0.02667	LG8
pde1b	127.043	197.811	51.4695	31.1751	1.59488	0.000337618	LG5
pde8b	11.424	21.0736	5.32443	4.1348	1.29473	0.0481695	LG12
ppfia2	15.3633	26.3654	6.9379	5.38181	1.32885	0.0264995	LG23
rasef	13.5906	27.4894	3.22693	3.60975	1.78138	0.000426966	LG9
rlbp1	6.10592	7.63333	0.48404	0.787582	1.88827	0.000433898	LG6
rnf17	8.86344	16.8589	2.74289	1.05011	1.74656	0.00152376	LG2
slc38a11	14.3785	16.7184	2.74289	2.23148	1.94919	1.44879e-05	LG2
sox5	15.7572	24.4922	5.00174	3.34722	1.69562	0.000475646	LG13
syndig1l	4.72717	5.80695	1.12943	0.787582	1.43556	0.0369665	LG22
tfap2e	7.87861	18.6853	2.0975	3.15033	1.44579	0.0276756	LG11
tmem130	51.014	57.5075	14.6825	6.95697	1.83442	2.14845e-05	LG19
tmem159	51.4079	52.6372	11.4556	10.698	1.86515	3.8442e-07	LG8
trpm1	165.845	291.518	31.7853	21.1334	2.44227	2.75018e-10	LG6
tspan10	4.5302	5.85378	0.322693	0.787582	1.58773	0.0122293	LG8
vwde	60.2714	113.142	1.77481	0.72195	4.07319	4.9937e-25	LG16
zdhhc2	155.603	237.944	20.975	17.5893	2.72627	1.38948e-14	LG10
